# Supplementary material
Source: PubMed Central journal article supplement (PMC3856826)
Supplement: 1310050110_pnas.201310050SI.pdf [file 1310050110_pnas.201310050SI.pdf]

# Supporting Information

Salio et al. 10.1073/pnas.1310050110

## SI Experimental Procedures

**RNA Extraction and Quantitative PCR.** RNA was extracted from 10<sup>6</sup> cells with RNAeasy columns (Qiagen) and quantified with a Nanodrop Spectrophotometer. cDNA was synthesized from 200 ng RNA using the High-Capacity cDNA Archive kit (Applied Biosystems). Real-time quantitative PCR was performed in duplicate on the Applied Biosystems 7500 Fast Real-Time PCR system, according to the manufacturer's instructions, using Applied Biosystems Taqman Universal PCR Master mix and Taqman probes. Analysis of gene expression was calculated according to the 2<sup>-ΔCt</sup> method using *GAPDH* as a housekeeping gene.

**Confocal Microscopy.** THP-1 cells expressing WT-CD1d (CD1d-WT) or tail-deleted CD1d (TD-CD1d) were seeded on polylysine-coated glass slides for 30 min in complete medium. The samples were fixed with 4% PFA for 15 min at room temperature and then blocked for 2 h with blocking buffer containing 10% FCS, 10% human serum, and 1% BSA, before staining with anti-human CD1d (clone 51-1-3) and anti-Lamp1 (BioLegend, cat. 328602) or anti-EEA1 (BD cat. 610456). Samples were washed three times with PBS and stained with the relevant secondary antibodies in blocking buffer for 1 h at room temperature: anti-mouse IgG1-Alexa 647 (Invitrogen cat. A21240) and anti-mouse IgG2b-Alexa 488 (Invitrogen cat. A21141). After extensive washing, glass slides were mounted (SouthernBiotech cat. 0100–20) and imaged. Confocal images were acquired using the Zeiss LSM 510 META, processed with ImageJ<sup>88</sup>.

## SI Text

**Sequence of the Soluble Invariant Natural Killer T Cell T-Cell Receptor-β Chain Used in This Study.** (Nomenclature accordingly to the International Immunogenetics database)

Vβ11 sequence: CASS

N-Dβ-N: PALAGP

Jβ2.1 sequence: SYNEQFFGPGTRLTVL

**Model Description.** The molecules we include in the model are saposin (S), a population of irrelevant lipids (L), a population of relevant lipids (L\*), and CD1d bound to irrelevant and relevant lipids (C and C\*, respectively). A simplified schematic showing the interactions between these molecules is shown in Fig. 4A.

We assume that in the absence of Saposin there is a background exchange of lipids,

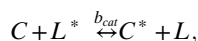

where  $b_{cat}$  is the rate constant (in units of  $\mu\text{M}^{-1}\cdot\text{s}^{-1}$ ) of background saposin-independent lipid exchange, which we take to be equal for both the relevant and irrelevant lipid. We allow saposin to directly bind both relevant and irrelevant lipids,

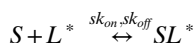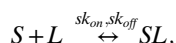

where  $SL^*$  and  $SL$  are the saposin bound to the relevant and irrelevant lipid, respectively, and  $k_{on}$  and  $k_{off}$  are the on-rate (in units of  $\mu\text{M}^{-1}\cdot\text{s}^{-1}$ ) and off-rate (in units of  $\text{s}^{-1}$ ), respectively. When bound to lipids, saposin is able to bind to CD1d and exchange lipids,

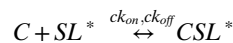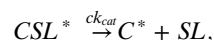

where  $CSL^*$  is a complex formed between CD1d (with irrelevant lipid) and saposin carrying a relevant lipid. This intermediate complex can either dissociate without catalysis ( $ck_{off}$  in units of  $\text{s}^{-1}$ ) or exchange lipids and dissociate ( $ck_{cat}$  in units of  $\text{s}^{-1}$ ). This lipid exchange is modeled as a classic enzymatic reaction. Note that the identical reaction is also possible with the irrelevant lipid,

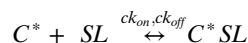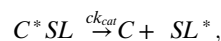

where  $C^*SL$  is a complex formed between CD1d (with relevant lipid) and saposin carrying an irrelevant lipid.

We have included an interaction between CD1d and saposin despite the fact that we have not observed such a complex in our surface plasmon resonance (SPR) experiments. We expect such a complex to form given that saposin does increase the exchange rate of lipids with CD1d.

We emphasize that in this mathematical model, neither CD1d nor saposin can differentiate between the relevant and irrelevant lipids, which can be seen by the fact that all reaction rates involving the relevant lipid are identical to those involving the irrelevant lipid.

**Parameter Values.** The reaction rate constants used for the model are shown in Table S2. In addition, the concentration of CD1d was taken to be 10  $\mu\text{M}$  and the concentration of the irrelevant lipid was taken to be 1,000  $\mu\text{M}$ . The concentration of saposin and the relevant lipid were varied.

The precise rate of lipid exchange in the presence or absence of saposin is presently unknown. We have therefore assumed a low rate of exchange in the absence of Saposin (small  $b_{cat}$ ) and a large rate of exchange in the presence of Saposin; it follows that the timescales shown in Fig. 4D are approximations, but we emphasize that the key observation is that saposin decreases the timescale of lipid exchange.

**Model Calculations.** The system of ordinary differential equations corresponding to the reactions described above were generated in BioNetGen and integrated in Matlab (Mathworks) (1).

1. Faeder JR, Blinov ML, Hlavacek WS (2009) Rule-based modeling of biochemical systems with BioNetGen. *Methods Mol Biol* 500:113–167.

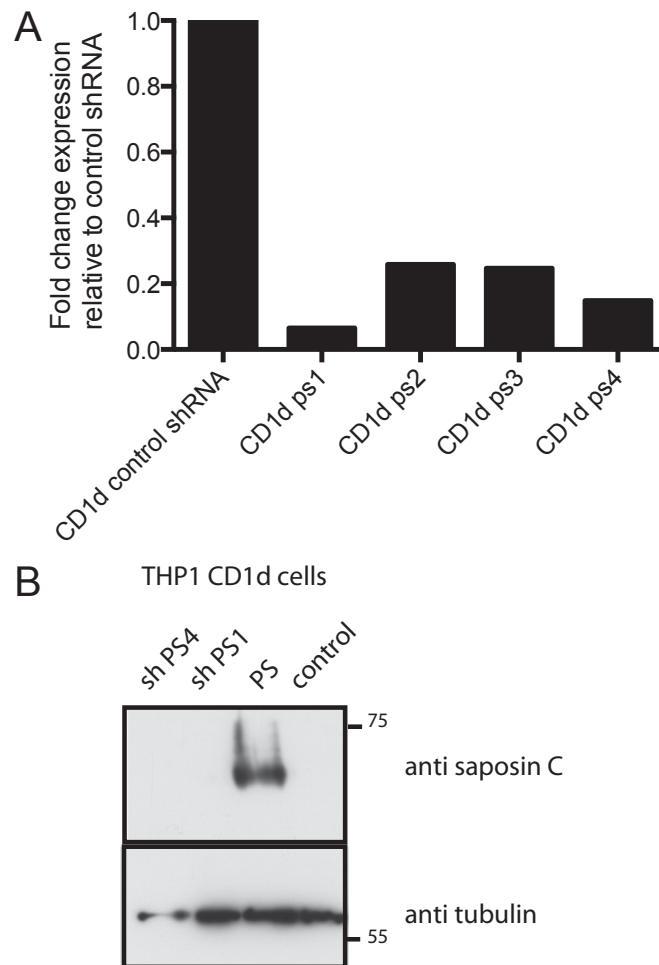

**Fig. S1.** Generation of prosaposin deficient THP-1-CD1d cells. (A) THP-1-CD1d cells were transduced with either control shRNA or four different prosaposin shRNA lentiviruses (Sigma; Mission shRNA). Knockdown was validated by quantitative PCR (Taqman Probes, Applied Biosystems) and fold-change expression of prosaposin relative to control shRNA was calculated according to the  $2^{-\Delta\Delta Ct}$  method. (B) Lysates from THP-1-CD1d cells transduced with control shRNA (control), prosaposin shRNAs (shPS1, shPS4), or overexpressing prosaposin (PS) were blotted with antisaposin C antibody and antitubulin. Because of sensitivity issues, we were unable to detect endogenous expression of prosaposin protein by Western blot, which was only detectable in the lysate of cells in which prosaposin was overexpressed (PS).



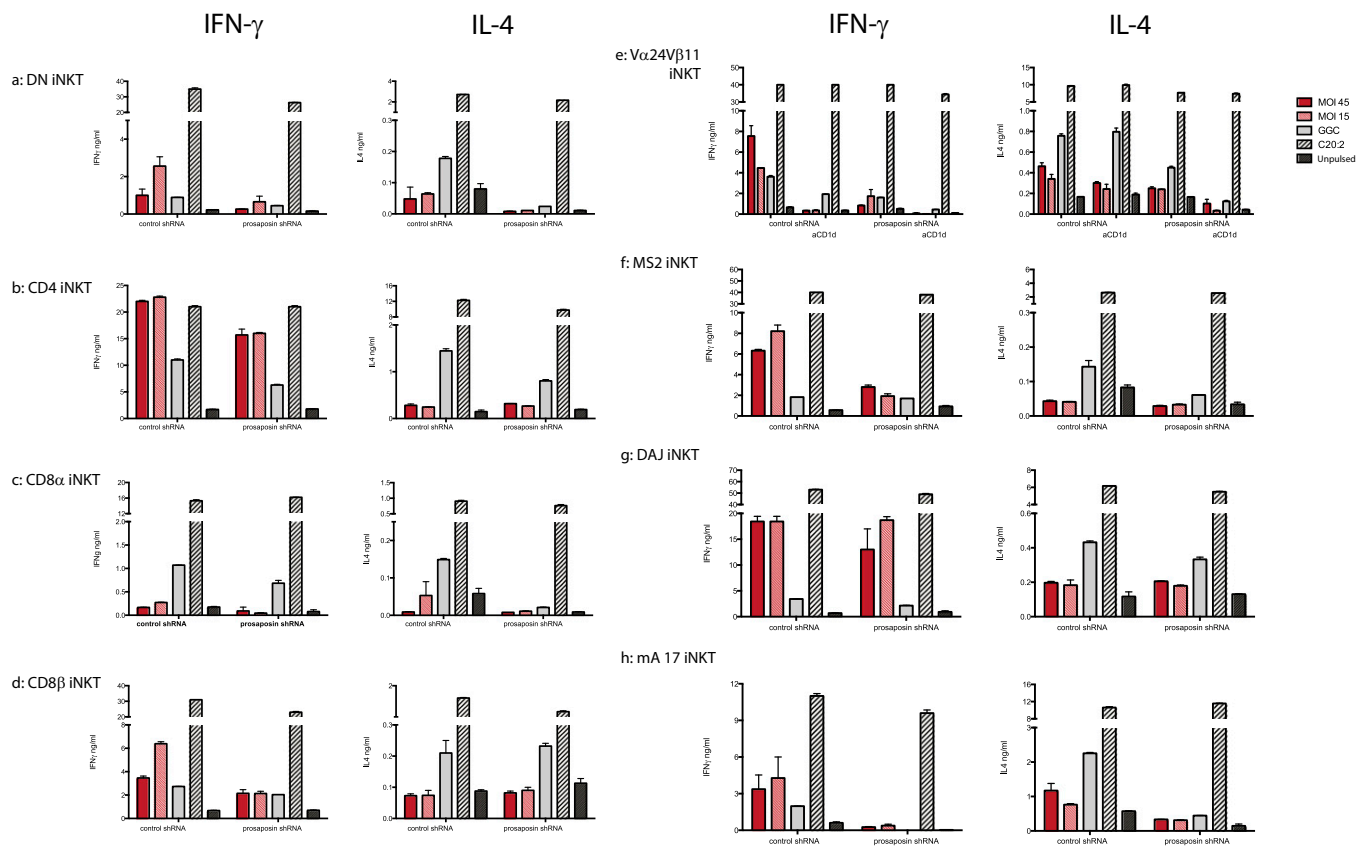

**Fig. S3.** Presentation of CD1d-binding self lipids is saposin dependent. THP-1-CD1d cells transduced with control or prosaposin shRNA were infected with *L. monocytogenes* at the indicated MOI or pulsed with glycolipid Gal( $\alpha$ 1 $\rightarrow$ 2)GalCer (GalGalCer; GGC, 5 ng/mL) or C20:2 (20 ng/mL) and incubated with eight different iNKT cell lines (phenotype described in the Table S1). Line V $\alpha$ 24V $\beta$ 11 was also tested in the presence or absence of the anti-CD1d blocking antibody (the same data for line V $\alpha$ 24V $\beta$ 11 are also shown in Fig. 1B). IFN- $\gamma$  and IL-4 secreted in the supernatant at 36 h were measured by ELISA (mean  $\pm$  SD).





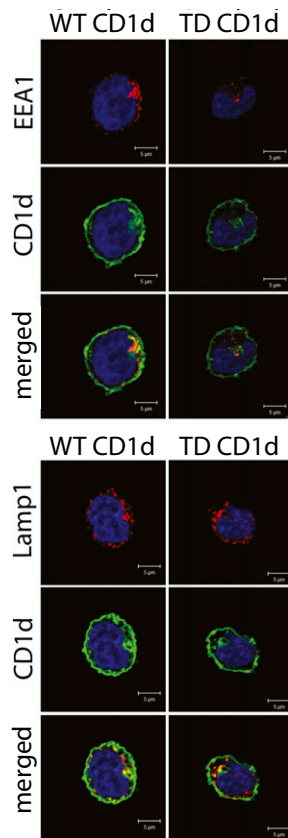

**Fig. S7.** Endolysosomal distribution of WT and tail-deleted CD1d molecules. Confocal microscopy of THP-1 cells expressing WT or tail-deleted CD1d molecules (TD-CD1d) molecules. Cells were stained with anti-human CD1d (green) and anti-EEA1 or anti-Lamp1 antibodies (red); nuclei were visualized with DAPI. Shown are representative confocal images obtained using a Zeiss LSM 510 META (Scale bars, 5  $\mu\text{m}$ .)

**Table S1. Phenotype of the iNKT cell lines used in this report**

| Cell lines                | Phenotype                          | CD161 |
|---------------------------|------------------------------------|-------|
| V $\alpha$ 24V $\beta$ 11 | 50% CD8 $\alpha$ ; 36% DN; 11% CD4 | 6%    |
| MS2                       | 32% CD8 $\alpha$ ; 59% DN; 8% CD4  | 72%   |
| mA17                      | 9% CD8 $\alpha$ ; 30% DN, 60% CD4  | 43%   |
| DAJ                       | 47% CD8 $\alpha$ ; 48% DN, 4% CD4  | 90%   |
| CD8 $\alpha$              | CD8 $\alpha^+$                     | 80%   |
| CD8 $\beta$               | CD8 $\alpha^+\beta^+$              | 10%   |
| CD4                       | 10% CD8 $\alpha$ ; 90% CD4         | 10%   |
| DN                        | 36% CD8 $\alpha$ ; 64% DN          | 100%  |

Eight NKT lines were used in this study and the phenotype is indicated in the table. The lines were all  $\alpha$ -GalCer-CD1d tetramer<sup>+</sup> V $\alpha$ 24<sup>+</sup>V $\beta$ 11<sup>+</sup>. The lines were derived either by direct antibody sorting from peripheral blood mononuclear cells (V $\alpha$ 24V $\beta$ 11) or after priming with dendritic cells pulsed with  $\alpha$ -GalCer as described in Gadola et al. (1). Cells were stained with a combination of  $\alpha$ -GalCer-CD1d tetramer, V $\alpha$ 24 (Immunotech), V $\beta$ 11 (Immunotech), CD4 (BD Pharmingen), CD8 $\alpha$  (BD Pharmingen), and CD8 $\beta$  and CD161 (eBiosciences) antibodies.

- Gadola SD, Dulphy N, Salio M, Cerundolo V (2002) V $\alpha$ 24-J $\alpha$ Q-independent, CD1d-restricted recognition of alpha-galactosylceramide by human CD4(+) and CD8 $\alpha$ beta(+) T lymphocytes. *J Immunol* 168(11):5514–5520.

**Table S2. Parameter values**

| Parameter         | Value     | Units                                |
|-------------------|-----------|--------------------------------------|
| $b_{\text{cat}}$  | $10^{-6}$ | $\mu\text{M}^{-1}\cdot\text{s}^{-1}$ |
| $sk_{\text{on}}$  | 1.0       | $\mu\text{M}^{-1}\cdot\text{s}^{-1}$ |
| $sk_{\text{off}}$ | 0.01      | $\text{s}^{-1}$                      |
| $ck_{\text{on}}$  | 1.0       | $\mu\text{M}^{-1}\cdot\text{s}^{-1}$ |
| $ck_{\text{off}}$ | 10        | $\text{s}^{-1}$                      |
| $ck_{\text{cat}}$ | 1.0       | $\text{s}^{-1}$                      |
